# Supplementary material
Source: Springer Nature journal article supplement (https://www.springermedizin.de/resource/supplementary/12875_2014_1131_MOESM3_ESM.pdf/9435884)
Supplement: MOESM3 [file 9435884]

**Enrollment**

Randomly selected by health insurance company from insurants with diabetes and excluded persons with dementia or severe mental diseases (n=5904)

Excluded (n= 2993)  
→ Declined to participate

Provided written informed consent (n=3811)

**Baseline (T<sub>1</sub>)**

Returned 1<sup>st</sup> questionnaire (n=3222)

**Follow-Up (T<sub>2</sub>)**

Returned 2<sup>nd</sup> questionnaire (n= 1832)  
Discontinued (n-1399)

**Follow-Up (T<sub>3</sub>)**

Returned 3<sup>rd</sup> questionnaire (n= 1867)  
Discontinued (n=1355)
